# Supplementary material
Source: publisher figshare collection journal article supplement (https://acs.figshare.com/ndownloader/files/4248346)
Supplement: Supplementary file 1 [file 4248346]

 
data_leo243 
  
_audit_creation_method            SHELXTL 
_chemical_name_systematic 
; 
 ? 
; 
_chemical_name_common             ? 
_chemical_melting_point           ? 
_chemical_formula_moiety          ? 
_chemical_formula_sum 
 'C28 H45 Br O5 Si' 
_chemical_formula_weight          569.64
_chemical_absolute_configuration  ad 
  
loop_ 
 _atom_type_symbol 
 _atom_type_description 
 _atom_type_scat_dispersion_real 
 _atom_type_scat_dispersion_imag 
 _atom_type_scat_source 
 'C'  'C'   0.0033   0.0016 
 'International Tables Vol C Tables 4.2.6.8 and 6.1.1.4' 
 'H'  'H'   0.0000   0.0000 
 'International Tables Vol C Tables 4.2.6.8 and 6.1.1.4' 
 'O'  'O'   0.0106   0.0060 
 'International Tables Vol C Tables 4.2.6.8 and 6.1.1.4' 
 'Si'  'Si'   0.0817   0.0704 
 'International Tables Vol C Tables 4.2.6.8 and 6.1.1.4' 
 'Br'  'Br'  -0.2901   2.4595 
 'International Tables Vol C Tables 4.2.6.8 and 6.1.1.4' 
  
_symmetry_cell_setting            Orthorhombic 
_symmetry_space_group_name_H-M    P2(1)2(1)2(1) 
  
loop_ 
 _symmetry_equiv_pos_as_xyz 
 'x, y, z' 
 '-x+1/2, -y, z+1/2' 
 '-x, y+1/2, -z+1/2' 
 'x+1/2, -y+1/2, -z' 
  
_cell_length_a                    11.9561(5) 
_cell_length_b                    12.5574(5) 
_cell_length_c                    23.2405(10) 
_cell_angle_alpha                 90.00 
_cell_angle_beta                  90.00 
_cell_angle_gamma                 90.00 
_cell_volume                      3489.3(3) 
_cell_formula_units_Z             4 
_cell_measurement_temperature     88(2) 
_cell_measurement_reflns_used     9955 
_cell_measurement_theta_min       2.35 
_cell_measurement_theta_max       27.29 
  
_exptl_crystal_description        block 
_exptl_crystal_colour             colorless 
_exptl_crystal_size_max           0.35 
_exptl_crystal_size_mid           0.21 
_exptl_crystal_size_min           0.08 
_exptl_crystal_density_meas       none 
_exptl_crystal_density_diffrn     1.084 
_exptl_crystal_density_method     'not measured' 
_exptl_crystal_F_000              1208 
_exptl_absorpt_coefficient_mu     1.241 
_exptl_absorpt_correction_type    numerical 
_exptl_absorpt_correction_T_min   0.6735 
_exptl_absorpt_correction_T_max   0.9029 
_exptl_absorpt_process_details    'Bruker SADABS' 
  
_exptl_special_details 
; 
 A colorless crystal of approximate dimensions 0.08 x 0.21 x 0.35 mm
 was mounted on a glass fiber and transferred to a Bruker SMART
 APEX II diffractometer.  The APEX2 program package was used to
 determine the unit-cell parameters and for data collection
 (30 sec/frame scan time for a sphere of diffraction data).
 The raw frame data was processed using SAINT2 and SADABS3 to yield the
 reflection data file.  Subsequent calculations were carried out using the
 SHELXTL program.  The diffraction symmetry was mmm and the systematic
 absences were consistent with the orthorhombic space group P212121 that was
 later determined to be correct.

; 
  
_diffrn_ambient_temperature       88(2) 
_diffrn_radiation_wavelength      0.71073 
_diffrn_radiation_type            MoK\a 
_diffrn_radiation_source          'fine-focus sealed tube' 
_diffrn_radiation_monochromator   graphite 
_diffrn_measurement_device_type   'Bruker APEX-II CCD' 
_diffrn_measurement_method        '\f and \w scans' 
_diffrn_detector_area_resol_mean  ? 
_diffrn_reflns_number             42100 
_diffrn_reflns_av_R_equivalents   0.0371 
_diffrn_reflns_av_sigmaI/netI     0.0332 
_diffrn_reflns_limit_h_min        -16 
_diffrn_reflns_limit_h_max        16 
_diffrn_reflns_limit_k_min        -16 
_diffrn_reflns_limit_k_max        16 
_diffrn_reflns_limit_l_min        -30 
_diffrn_reflns_limit_l_max        31 
_diffrn_reflns_theta_min          1.84 
_diffrn_reflns_theta_max          28.89 
_reflns_number_total              8695 
_reflns_number_gt                 7825 
_reflns_threshold_expression      >2sigma(I) 
  
_computing_data_collection        'Bruker APEX2' 
_computing_cell_refinement        'Bruker SAINT' 
_computing_data_reduction         'Bruker SAINT' 
_computing_structure_solution     'SHELXS-97 (Sheldrick, 2008)' 
_computing_structure_refinement   'SHELXL-97 (Sheldrick, 2008)' 
_computing_molecular_graphics     'Bruker SHELXTL' 
_computing_publication_material   'Bruker SHELXTL' 
  
_refine_special_details 
; 
 Refinement of F^2^ against ALL reflections.  The weighted R-factor wR and 
 goodness of fit S are based on F^2^, conventional R-factors R are based 
 on F, with F set to zero for negative F^2^. The threshold expression of 
 F^2^ > 2sigma(F^2^) is used only for calculating R-factors(gt) etc. and is 
 not relevant to the choice of reflections for refinement.  R-factors based 
 on F^2^ are statistically about twice as large as those based on F, and R- 
 factors based on ALL data will be even larger. The structure was solved by
 direct methods and refined on F2 by full-matrix least-squares techniques.
 The analytical scattering factors5 for neutral atoms were used throughout
 the analysis.  Hydrogen atoms were included using a riding model. 
 Least-squares analysis yielded wR2 = 0.1466 and Goof = 1.075 for 325 variables
 refined against 8695 data (0.74�), R1 = 0.0481 for those 7825 data with 
 I > 2.0sigma(I).  The absolute structure was assigned by refinement of the
 Flack parameter. There were several peaks in the final difference-Fourier map
 that were probably due to an unresolved solvent molecule.  Ethyl acetate and
 hexanes were used in the recrystallization.  It was not possible to identify the
 solvent or to include a disorder model to account for the solvent contributions.  

; 
  
_refine_ls_structure_factor_coef  Fsqd 
_refine_ls_matrix_type            full 
_refine_ls_weighting_scheme       calc 
_refine_ls_weighting_details 
 'calc w=1/[\s^2^(Fo^2^)+(0.0946P)^2^+2.6260P] where P=(Fo^2^+2Fc^2^)/3' 
_atom_sites_solution_primary      direct 
_atom_sites_solution_secondary    difmap 
_atom_sites_solution_hydrogens    geom 
_refine_ls_hydrogen_treatment     constr 
_refine_ls_extinction_method      none 
_refine_ls_extinction_coef        ? 
_refine_ls_abs_structure_details 
 'Flack H D (1983), Acta Cryst. A39, 876-881' 
_refine_ls_abs_structure_Flack    0.001(8) 
_refine_ls_number_reflns          8695 
_refine_ls_number_parameters      325 
_refine_ls_number_restraints      0 
_refine_ls_R_factor_all           0.0558 
_refine_ls_R_factor_gt            0.0481 
_refine_ls_wR_factor_ref          0.1466 
_refine_ls_wR_factor_gt           0.1417 
_refine_ls_goodness_of_fit_ref    1.075 
_refine_ls_restrained_S_all       1.075 
_refine_ls_shift/su_max           0.002 
_refine_ls_shift/su_mean          0.000 
  
loop_ 
 _atom_site_label 
 _atom_site_type_symbol 
 _atom_site_fract_x 
 _atom_site_fract_y 
 _atom_site_fract_z 
 _atom_site_U_iso_or_equiv 
 _atom_site_adp_type 
 _atom_site_occupancy 
 _atom_site_symmetry_multiplicity 
 _atom_site_calc_flag 
 _atom_site_refinement_flags 
 _atom_site_disorder_assembly 
 _atom_site_disorder_group 
Br1 Br 0.60414(3) 0.80036(3) 0.900140(14) 0.02329(10) Uani 1 1 d . . . 
Si1 Si 0.90109(9) 0.66842(7) 0.81579(4) 0.01804(18) Uani 1 1 d . . . 
O1 O 0.5914(2) 0.9707(2) 1.03416(11) 0.0258(5) Uani 1 1 d . . . 
O2 O 0.7055(2) 0.5887(2) 0.95476(12) 0.0289(6) Uani 1 1 d . . . 
O3 O 0.8837(2) 0.74327(17) 0.87452(9) 0.0173(4) Uani 1 1 d . . . 
O4 O 0.9815(2) 0.94778(19) 0.86846(11) 0.0208(5) Uani 1 1 d . . . 
O5 O 1.1253(2) 0.88171(19) 0.91957(12) 0.0235(5) Uani 1 1 d . . . 
C1 C 0.8277(3) 1.1771(3) 1.08695(15) 0.0225(7) Uani 1 1 d . . . 
H1A H 0.8392 1.1807 1.1291 0.027 Uiso 1 1 calc R . . 
H1B H 0.7493 1.1555 1.0798 0.027 Uiso 1 1 calc R . . 
C2 C 0.8483(3) 1.2878(3) 1.06048(17) 0.0264(8) Uani 1 1 d . . . 
H2A H 0.8131 1.3421 1.0856 0.032 Uiso 1 1 calc R . . 
H2B H 0.9298 1.3017 1.0602 0.032 Uiso 1 1 calc R . . 
C3 C 0.8041(3) 1.3018(3) 1.00034(16) 0.0258(7) Uani 1 1 d . . . 
H3A H 0.8209 1.3757 0.9883 0.031 Uiso 1 1 calc R . . 
H3B H 0.7217 1.2951 1.0021 0.031 Uiso 1 1 calc R . . 
C4 C 0.8465(3) 1.2261(3) 0.95181(16) 0.0212(7) Uani 1 1 d . . . 
C5 C 0.8130(3) 1.1072(2) 0.95936(15) 0.0180(6) Uani 1 1 d . . . 
H5A H 0.8321 1.0725 0.9219 0.022 Uiso 1 1 calc R . . 
C6 C 0.6862(3) 1.0879(3) 0.96751(16) 0.0233(7) Uani 1 1 d . . . 
H6A H 0.6494 1.1527 0.9828 0.028 Uiso 1 1 calc R . . 
H6B H 0.6508 1.0690 0.9304 0.028 Uiso 1 1 calc R . . 
C7 C 0.6755(3) 0.9970(3) 1.00985(15) 0.0199(6) Uani 1 1 d . . . 
C8 C 0.7903(3) 0.9442(3) 1.01825(14) 0.0172(6) Uani 1 1 d . . . 
C9 C 0.8734(2) 1.0386(2) 1.00626(14) 0.0157(6) Uani 1 1 d . . . 
H9A H 0.9430 1.0083 0.9888 0.019 Uiso 1 1 calc R . . 
C10 C 0.9055(3) 1.0951(2) 1.06164(13) 0.0181(6) Uani 1 1 d . . . 
C11 C 0.7523(3) 0.6700(3) 0.96913(15) 0.0209(7) Uani 1 1 d . . . 
C12 C 0.8661(3) 0.6811(3) 0.99470(14) 0.0182(6) Uani 1 1 d . . . 
H12A H 0.9157 0.6230 0.9814 0.022 Uiso 1 1 calc R . . 
H12B H 0.8622 0.6794 1.0372 0.022 Uiso 1 1 calc R . . 
C13 C 0.9090(3) 0.7900(2) 0.97350(12) 0.0141(5) Uani 1 1 d . . . 
H13A H 0.9626 0.8213 1.0019 0.017 Uiso 1 1 calc R . . 
C14 C 0.8019(3) 0.8610(2) 0.96815(14) 0.0155(6) Uani 1 1 d . . . 
H14A H 0.8053 0.9005 0.9308 0.019 Uiso 1 1 calc R . . 
C15 C 0.7025(3) 0.7820(3) 0.96581(14) 0.0185(6) Uani 1 1 d . . . 
H15A H 0.6568 0.7932 1.0013 0.022 Uiso 1 1 calc R . . 
C16 C 0.9661(3) 0.7745(2) 0.91463(13) 0.0162(6) Uani 1 1 d . . . 
H16A H 1.0237 0.7171 0.9178 0.019 Uiso 1 1 calc R . . 
C17 C 1.0043(3) 1.0740(3) 1.08730(17) 0.0268(8) Uani 1 1 d . . . 
H17A H 1.0249 1.1110 1.1214 0.032 Uiso 1 1 calc R . . 
H17B H 1.0533 1.0223 1.0713 0.032 Uiso 1 1 calc R . . 
C18 C 0.7992(3) 0.8923(3) 1.07701(15) 0.0219(7) Uani 1 1 d . . . 
H18A H 0.7780 0.9438 1.1067 0.033 Uiso 1 1 calc R . . 
H18B H 0.8764 0.8689 1.0835 0.033 Uiso 1 1 calc R . . 
H18C H 0.7491 0.8307 1.0788 0.033 Uiso 1 1 calc R . . 
C19 C 0.9747(3) 1.2329(3) 0.94531(18) 0.0257(8) Uani 1 1 d . . . 
H19A H 0.9962 1.3066 0.9369 0.039 Uiso 1 1 calc R . . 
H19B H 0.9989 1.1866 0.9137 0.039 Uiso 1 1 calc R . . 
H19C H 1.0104 1.2100 0.9812 0.039 Uiso 1 1 calc R . . 
C20 C 0.7919(3) 1.2648(3) 0.89518(18) 0.0301(8) Uani 1 1 d . . . 
H20A H 0.8223 1.3347 0.8849 0.045 Uiso 1 1 calc R . . 
H20B H 0.7108 1.2703 0.9004 0.045 Uiso 1 1 calc R . . 
H20C H 0.8081 1.2138 0.8644 0.045 Uiso 1 1 calc R . . 
C21 C 1.0224(3) 0.8779(2) 0.89671(14) 0.0156(6) Uani 1 1 d . . . 
C22 C 1.1832(3) 0.9826(3) 0.91217(19) 0.0311(9) Uani 1 1 d . . . 
H22A H 1.2388 0.9912 0.9428 0.047 Uiso 1 1 calc R . . 
H22B H 1.1291 1.0411 0.9140 0.047 Uiso 1 1 calc R . . 
H22C H 1.2208 0.9835 0.8747 0.047 Uiso 1 1 calc R . . 
C23 C 1.0405(4) 0.6021(3) 0.81878(17) 0.0317(9) Uani 1 1 d . . . 
H23A H 1.0418 0.5511 0.8507 0.048 Uiso 1 1 calc R . . 
H23B H 1.0988 0.6559 0.8247 0.048 Uiso 1 1 calc R . . 
H23C H 1.0543 0.5645 0.7825 0.048 Uiso 1 1 calc R . . 
C24 C 0.7870(4) 0.5690(3) 0.8172(2) 0.0363(10) Uani 1 1 d . . . 
H24A H 0.7916 0.5275 0.8528 0.054 Uiso 1 1 calc R . . 
H24B H 0.7943 0.5213 0.7840 0.054 Uiso 1 1 calc R . . 
H24C H 0.7147 0.6057 0.8155 0.054 Uiso 1 1 calc R . . 
C25 C 0.8901(3) 0.7549(3) 0.74940(13) 0.0199(6) Uani 1 1 d . . . 
C26 C 0.8618(3) 0.6837(3) 0.69815(15) 0.0252(7) Uani 1 1 d . . . 
H26A H 0.8576 0.7271 0.6632 0.038 Uiso 1 1 calc R . . 
H26B H 0.7896 0.6489 0.7048 0.038 Uiso 1 1 calc R . . 
H26C H 0.9201 0.6295 0.6936 0.038 Uiso 1 1 calc R . . 
C27 C 1.0010(3) 0.8128(3) 0.73742(16) 0.0297(8) Uani 1 1 d . . . 
H27A H 0.9963 0.8499 0.7004 0.045 Uiso 1 1 calc R . . 
H27B H 1.0621 0.7608 0.7361 0.045 Uiso 1 1 calc R . . 
H27C H 1.0154 0.8646 0.7681 0.045 Uiso 1 1 calc R . . 
C28 C 0.7978(3) 0.8379(3) 0.75711(16) 0.0265(8) Uani 1 1 d . . . 
H28A H 0.7979 0.8866 0.7242 0.040 Uiso 1 1 calc R . . 
H28B H 0.8112 0.8783 0.7925 0.040 Uiso 1 1 calc R . . 
H28C H 0.7251 0.8021 0.7596 0.040 Uiso 1 1 calc R . . 
  
loop_ 
 _atom_site_aniso_label 
 _atom_site_aniso_U_11 
 _atom_site_aniso_U_22 
 _atom_site_aniso_U_33 
 _atom_site_aniso_U_23 
 _atom_site_aniso_U_13 
 _atom_site_aniso_U_12 
Br1 0.01639(15) 0.02999(18) 0.02349(16) -0.00076(13) -0.00254(13) -0.00159(13) 
Si1 0.0234(4) 0.0126(4) 0.0182(4) -0.0031(3) -0.0039(4) 0.0014(4) 
O1 0.0172(12) 0.0273(13) 0.0329(13) -0.0017(10) 0.0091(11) -0.0016(10) 
O2 0.0313(14) 0.0218(12) 0.0337(14) 0.0008(11) -0.0013(12) -0.0121(11) 
O3 0.0184(11) 0.0156(10) 0.0178(10) -0.0033(8) -0.0029(9) -0.0011(9) 
O4 0.0204(12) 0.0152(11) 0.0267(13) 0.0032(10) -0.0026(10) 0.0018(9) 
O5 0.0183(13) 0.0168(11) 0.0354(13) 0.0106(10) -0.0060(10) -0.0074(9) 
C1 0.0213(16) 0.0185(16) 0.0277(18) -0.0052(13) 0.0047(13) 0.0037(12) 
C2 0.0270(17) 0.0178(17) 0.0345(19) -0.0062(15) 0.0069(14) 0.0044(14) 
C3 0.0280(17) 0.0134(14) 0.0361(18) 0.0008(15) 0.0055(15) 0.0058(14) 
C4 0.0215(16) 0.0128(15) 0.0294(18) 0.0014(13) 0.0040(13) 0.0010(12) 
C5 0.0164(15) 0.0142(15) 0.0234(16) 0.0007(12) 0.0027(12) 0.0023(11) 
C6 0.0179(16) 0.0227(16) 0.0294(18) 0.0038(14) 0.0023(14) 0.0003(13) 
C7 0.0190(15) 0.0172(15) 0.0235(16) -0.0037(13) 0.0019(13) 0.0006(12) 
C8 0.0173(15) 0.0141(14) 0.0203(15) -0.0010(12) 0.0046(12) -0.0002(11) 
C9 0.0132(15) 0.0141(14) 0.0199(15) -0.0019(11) 0.0018(11) 0.0008(10) 
C10 0.0186(15) 0.0147(13) 0.0211(14) -0.0029(11) 0.0023(13) 0.0009(13) 
C11 0.0243(16) 0.0174(16) 0.0209(16) 0.0023(12) 0.0011(13) -0.0061(13) 
C12 0.0233(16) 0.0126(15) 0.0188(15) 0.0008(11) 0.0005(12) -0.0022(11) 
C13 0.0143(13) 0.0126(13) 0.0155(12) -0.0003(10) 0.0011(11) -0.0004(11) 
C14 0.0141(14) 0.0140(14) 0.0184(15) -0.0011(11) 0.0005(11) 0.0001(11) 
C15 0.0155(14) 0.0210(17) 0.0189(15) 0.0004(12) 0.0003(12) -0.0047(12) 
C16 0.0165(14) 0.0133(14) 0.0189(15) -0.0012(11) 0.0001(11) -0.0001(11) 
C17 0.0251(18) 0.0222(17) 0.033(2) -0.0082(14) -0.0031(15) 0.0046(14) 
C18 0.0275(18) 0.0205(16) 0.0178(15) 0.0006(13) 0.0039(13) -0.0013(14) 
C19 0.0242(18) 0.0179(16) 0.0352(19) 0.0001(14) 0.0067(15) -0.0035(13) 
C20 0.034(2) 0.0237(17) 0.033(2) 0.0064(16) 0.0004(16) 0.0016(14) 
C21 0.0172(14) 0.0149(14) 0.0147(14) -0.0008(12) 0.0037(12) -0.0003(11) 
C22 0.0236(17) 0.0211(17) 0.049(2) 0.0156(16) -0.0107(17) -0.0124(14) 
C23 0.040(2) 0.030(2) 0.0243(18) -0.0077(16) -0.0090(17) 0.0177(17) 
C24 0.052(3) 0.0222(19) 0.035(2) -0.0060(16) -0.0004(19) -0.0182(18) 
C25 0.0246(16) 0.0198(15) 0.0154(13) -0.0021(11) 0.0011(13) 0.0023(14) 
C26 0.0288(17) 0.0278(19) 0.0191(16) -0.0059(14) -0.0024(13) 0.0056(14) 
C27 0.032(2) 0.031(2) 0.0264(18) -0.0021(16) 0.0054(15) -0.0027(17) 
C28 0.031(2) 0.0275(18) 0.0211(16) -0.0002(14) -0.0047(14) 0.0096(15) 
  
_geom_special_details 
; 
 All esds (except the esd in the dihedral angle between two l.s. planes) 
 are estimated using the full covariance matrix.  The cell esds are taken 
 into account individually in the estimation of esds in distances, angles 
 and torsion angles; correlations between esds in cell parameters are only 
 used when they are defined by crystal symmetry.  An approximate (isotropic) 
 treatment of cell esds is used for estimating esds involving l.s. planes. 
; 
  
loop_ 
 _geom_bond_atom_site_label_1 
 _geom_bond_atom_site_label_2 
 _geom_bond_distance 
 _geom_bond_site_symmetry_2 
 _geom_bond_publ_flag 
Br1 C15 1.941(3) . ? 
Si1 O3 1.670(2) . ? 
Si1 C24 1.849(4) . ? 
Si1 C23 1.865(4) . ? 
Si1 C25 1.892(3) . ? 
O1 C7 1.200(4) . ? 
O2 C11 1.211(4) . ? 
O3 C16 1.411(4) . ? 
O4 C21 1.200(4) . ? 
O5 C21 1.341(4) . ? 
O5 C22 1.454(4) . ? 
C1 C10 1.507(4) . ? 
C1 C2 1.540(5) . ? 
C2 C3 1.504(5) . ? 
C3 C4 1.560(5) . ? 
C4 C19 1.542(5) . ? 
C4 C20 1.547(5) . ? 
C4 C5 1.555(5) . ? 
C5 C6 1.548(5) . ? 
C5 C9 1.566(4) . ? 
C6 C7 1.512(5) . ? 
C7 C8 1.537(5) . ? 
C8 C18 1.517(5) . ? 
C8 C14 1.570(4) . ? 
C8 C9 1.571(4) . ? 
C9 C10 1.519(4) . ? 
C10 C17 1.349(5) . ? 
C11 C12 1.491(5) . ? 
C11 C15 1.530(5) . ? 
C12 C13 1.541(4) . ? 
C13 C16 1.541(4) . ? 
C13 C14 1.566(4) . ? 
C14 C15 1.549(4) . ? 
C16 C21 1.521(4) . ? 
C25 C26 1.527(5) . ? 
C25 C28 1.529(5) . ? 
C25 C27 1.538(5) . ? 
  
loop_ 
 _geom_angle_atom_site_label_1 
 _geom_angle_atom_site_label_2 
 _geom_angle_atom_site_label_3 
 _geom_angle 
 _geom_angle_site_symmetry_1 
 _geom_angle_site_symmetry_3 
 _geom_angle_publ_flag 
O3 Si1 C24 105.91(17) . . ? 
O3 Si1 C23 109.38(15) . . ? 
C24 Si1 C23 111.0(2) . . ? 
O3 Si1 C25 109.57(13) . . ? 
C24 Si1 C25 110.51(19) . . ? 
C23 Si1 C25 110.42(19) . . ? 
C16 O3 Si1 127.6(2) . . ? 
C21 O5 C22 114.9(3) . . ? 
C10 C1 C2 111.3(3) . . ? 
C3 C2 C1 114.9(3) . . ? 
C2 C3 C4 119.1(3) . . ? 
C19 C4 C20 108.6(3) . . ? 
C19 C4 C5 108.7(3) . . ? 
C20 C4 C5 106.8(3) . . ? 
C19 C4 C3 111.1(3) . . ? 
C20 C4 C3 106.7(3) . . ? 
C5 C4 C3 114.8(3) . . ? 
C6 C5 C4 114.6(3) . . ? 
C6 C5 C9 106.3(3) . . ? 
C4 C5 C9 119.2(3) . . ? 
C7 C6 C5 106.3(3) . . ? 
O1 C7 C6 125.8(3) . . ? 
O1 C7 C8 124.7(3) . . ? 
C6 C7 C8 109.5(3) . . ? 
C18 C8 C7 111.2(3) . . ? 
C18 C8 C14 112.1(3) . . ? 
C7 C8 C14 105.8(3) . . ? 
C18 C8 C9 116.0(3) . . ? 
C7 C8 C9 102.5(3) . . ? 
C14 C8 C9 108.3(2) . . ? 
C10 C9 C5 116.7(3) . . ? 
C10 C9 C8 111.2(3) . . ? 
C5 C9 C8 104.3(2) . . ? 
C17 C10 C1 120.1(3) . . ? 
C17 C10 C9 120.3(3) . . ? 
C1 C10 C9 119.6(3) . . ? 
O2 C11 C12 127.6(3) . . ? 
O2 C11 C15 125.5(3) . . ? 
C12 C11 C15 106.8(3) . . ? 
C11 C12 C13 105.1(3) . . ? 
C16 C13 C12 108.7(2) . . ? 
C16 C13 C14 111.3(2) . . ? 
C12 C13 C14 105.0(2) . . ? 
C15 C14 C13 105.4(2) . . ? 
C15 C14 C8 112.6(3) . . ? 
C13 C14 C8 113.1(3) . . ? 
C11 C15 C14 106.8(3) . . ? 
C11 C15 Br1 112.6(2) . . ? 
C14 C15 Br1 114.6(2) . . ? 
O3 C16 C21 111.4(3) . . ? 
O3 C16 C13 108.2(3) . . ? 
C21 C16 C13 109.4(2) . . ? 
O4 C21 O5 124.4(3) . . ? 
O4 C21 C16 126.4(3) . . ? 
O5 C21 C16 109.2(3) . . ? 
C26 C25 C28 109.3(3) . . ? 
C26 C25 C27 109.0(3) . . ? 
C28 C25 C27 108.8(3) . . ? 
C26 C25 Si1 108.4(2) . . ? 
C28 C25 Si1 110.3(2) . . ? 
C27 C25 Si1 111.0(3) . . ? 
  
loop_ 
 _geom_torsion_atom_site_label_1 
 _geom_torsion_atom_site_label_2 
 _geom_torsion_atom_site_label_3 
 _geom_torsion_atom_site_label_4 
 _geom_torsion 
 _geom_torsion_site_symmetry_1 
 _geom_torsion_site_symmetry_2 
 _geom_torsion_site_symmetry_3 
 _geom_torsion_site_symmetry_4 
 _geom_torsion_publ_flag 
C24 Si1 O3 C16 133.4(3) . . . . ? 
C23 Si1 O3 C16 13.7(3) . . . . ? 
C25 Si1 O3 C16 -107.4(3) . . . . ? 
C10 C1 C2 C3 75.0(4) . . . . ? 
C1 C2 C3 C4 -58.5(5) . . . . ? 
C2 C3 C4 C19 -58.5(5) . . . . ? 
C2 C3 C4 C20 -176.6(3) . . . . ? 
C2 C3 C4 C5 65.3(5) . . . . ? 
C19 C4 C5 C6 179.0(3) . . . . ? 
C20 C4 C5 C6 -64.1(4) . . . . ? 
C3 C4 C5 C6 53.9(4) . . . . ? 
C19 C4 C5 C9 51.4(4) . . . . ? 
C20 C4 C5 C9 168.3(3) . . . . ? 
C3 C4 C5 C9 -73.7(4) . . . . ? 
C4 C5 C6 C7 -143.6(3) . . . . ? 
C9 C5 C6 C7 -9.7(4) . . . . ? 
C5 C6 C7 O1 166.9(3) . . . . ? 
C5 C6 C7 C8 -11.9(4) . . . . ? 
O1 C7 C8 C18 -25.8(5) . . . . ? 
C6 C7 C8 C18 153.0(3) . . . . ? 
O1 C7 C8 C14 96.2(4) . . . . ? 
C6 C7 C8 C14 -85.0(3) . . . . ? 
O1 C7 C8 C9 -150.5(3) . . . . ? 
C6 C7 C8 C9 28.4(3) . . . . ? 
C6 C5 C9 C10 -96.1(3) . . . . ? 
C4 C5 C9 C10 35.2(4) . . . . ? 
C6 C5 C9 C8 27.0(3) . . . . ? 
C4 C5 C9 C8 158.3(3) . . . . ? 
C18 C8 C9 C10 -28.1(4) . . . . ? 
C7 C8 C9 C10 93.3(3) . . . . ? 
C14 C8 C9 C10 -155.2(3) . . . . ? 
C18 C8 C9 C5 -154.7(3) . . . . ? 
C7 C8 C9 C5 -33.2(3) . . . . ? 
C14 C8 C9 C5 78.3(3) . . . . ? 
C2 C1 C10 C17 92.3(4) . . . . ? 
C2 C1 C10 C9 -86.1(4) . . . . ? 
C5 C9 C10 C17 -140.2(3) . . . . ? 
C8 C9 C10 C17 100.4(4) . . . . ? 
C5 C9 C10 C1 38.2(4) . . . . ? 
C8 C9 C10 C1 -81.3(4) . . . . ? 
O2 C11 C12 C13 148.9(4) . . . . ? 
C15 C11 C12 C13 -32.8(3) . . . . ? 
C11 C12 C13 C16 -87.2(3) . . . . ? 
C11 C12 C13 C14 32.0(3) . . . . ? 
C16 C13 C14 C15 98.4(3) . . . . ? 
C12 C13 C14 C15 -18.9(3) . . . . ? 
C16 C13 C14 C8 -138.2(3) . . . . ? 
C12 C13 C14 C8 104.5(3) . . . . ? 
C18 C8 C14 C15 67.0(4) . . . . ? 
C7 C8 C14 C15 -54.4(3) . . . . ? 
C9 C8 C14 C15 -163.7(3) . . . . ? 
C18 C8 C14 C13 -52.3(4) . . . . ? 
C7 C8 C14 C13 -173.7(2) . . . . ? 
C9 C8 C14 C13 77.0(3) . . . . ? 
O2 C11 C15 C14 -160.9(3) . . . . ? 
C12 C11 C15 C14 20.7(3) . . . . ? 
O2 C11 C15 Br1 -34.3(4) . . . . ? 
C12 C11 C15 Br1 147.4(2) . . . . ? 
C13 C14 C15 C11 -0.5(3) . . . . ? 
C8 C14 C15 C11 -124.3(3) . . . . ? 
C13 C14 C15 Br1 -126.0(2) . . . . ? 
C8 C14 C15 Br1 110.3(3) . . . . ? 
Si1 O3 C16 C21 88.4(3) . . . . ? 
Si1 O3 C16 C13 -151.3(2) . . . . ? 
C12 C13 C16 O3 65.9(3) . . . . ? 
C14 C13 C16 O3 -49.2(3) . . . . ? 
C12 C13 C16 C21 -172.6(3) . . . . ? 
C14 C13 C16 C21 72.4(3) . . . . ? 
C22 O5 C21 O4 5.2(5) . . . . ? 
C22 O5 C21 C16 -172.3(3) . . . . ? 
O3 C16 C21 O4 28.4(4) . . . . ? 
C13 C16 C21 O4 -91.2(4) . . . . ? 
O3 C16 C21 O5 -154.2(3) . . . . ? 
C13 C16 C21 O5 86.2(3) . . . . ? 
O3 Si1 C25 C26 -158.8(2) . . . . ? 
C24 Si1 C25 C26 -42.5(3) . . . . ? 
C23 Si1 C25 C26 80.6(3) . . . . ? 
O3 Si1 C25 C28 -39.2(3) . . . . ? 
C24 Si1 C25 C28 77.1(3) . . . . ? 
C23 Si1 C25 C28 -159.7(3) . . . . ? 
O3 Si1 C25 C27 81.4(3) . . . . ? 
C24 Si1 C25 C27 -162.2(3) . . . . ? 
C23 Si1 C25 C27 -39.1(3) . . . . ? 
  
_diffrn_measured_fraction_theta_max    0.963 
_diffrn_reflns_theta_full              25.50 
_diffrn_measured_fraction_theta_full   0.996 
_refine_diff_density_max    1.828 
_refine_diff_density_min   -0.395 
_refine_diff_density_rms    0.134 
